# Supplementary material for: Speciation analysis of inorganic arsenic in food and water samples by electrothermal atomic absorption spectrometry after magnetic solid phase extraction by a novel MOF-199/modified magnetite nanoparticle composite
Source: Royal Society of Chemistry journal article supplement (doi:10.1039/c6ra21819a), 2016-01-01
Supplement: c6ra21819a1.pdf [file c6ra21819a1.pdf]

**Speciation analysis of inorganic arsenic in food and water samples by electrothermal  
atomic absorption spectrometry after magnetic solid phase extraction by a novel MOF-  
199/modified magnetite nanoparticles composite**

Abolfazl Abbaszadeh, Azadeh Tadjarodi\*

*Research laboratory of inorganic materials synthesis, Department of Chemistry, Iran University of  
Science and Technology, Narmak, Tehran 16846-13114, Iran*

\* Corresponding author: Tel.: +98 2177240516; fax: +98 2177491204  
E-mail address: [tajarodi@iust.ac.ir](mailto:tajarodi@iust.ac.ir) (A. Tadjarodi)

**Table1S**

Experimental variables along with their levels in Box Behnken design (BBD).

|               |                                                  | Level |         |       |
|---------------|--------------------------------------------------|-------|---------|-------|
|               |                                                  | Lower | Central | Upper |
| Sorption step | A: pH                                            | 1.0   | 3.0     | 5.0   |
|               | B: Sorbent amount (mg)                           | 7.0   | 13.5    | 20.0  |
|               | C: Uptake time (mg)                              | 3.0   | 9.0     | 15.0  |
| Elution step  | A: Thiourea concentration (mol L <sup>-1</sup> ) | 0.4   | 0.95    | 1.5   |
|               | B: HCl concentration (mol L <sup>-1</sup> )      | 0     | 0.05    | 0.1   |
|               | C: Eluent volume (mL)                            | 1.5   | 2.25    | 3.0   |
|               | D: Elution time (min)                            | 5.0   | 10.0    | 15.0  |

**Table 2S**

The recovery of As(III) ions in the presence of potentially interfering ions.

| Potentially interfering Ions     | Tolerable concentration ratio X/As(III) | Recovery (%) |
|----------------------------------|-----------------------------------------|--------------|
| Cl <sup>-</sup>                  | 11000                                   | 96.1 ± 6.2   |
| CH <sub>3</sub> COO <sup>-</sup> | 15000                                   | 98.6 ± 5.8   |
| NO <sub>3</sub>                  | 12000                                   | 96.4 ± 5.8   |
| SO <sub>4</sub> <sup>2-</sup>    | 10000                                   | 95.0 ± 5.3   |
| CrO <sub>4</sub> <sup>-</sup>    | 100                                     | 94.5 ± 4.3   |
| K <sup>+</sup>                   | 10000                                   | 99.5 ± 7.0   |
| Na <sup>+</sup>                  | 10000                                   | 98.7 ± 6.2   |
| Mg <sup>2+</sup>                 | 2000                                    | 98.1 ± 3.9   |
| Ca <sup>2+</sup>                 | 2000                                    | 96.1 ± 5.5   |
| Pb <sup>2+</sup>                 | 250                                     | 95.8 ± 4.7   |
| Co <sup>2+</sup>                 | 200                                     | 97.1 ± 5.6   |
| Zn <sup>2+</sup>                 | 150                                     | 95.0 ± 4.1   |
| Cu <sup>2+</sup>                 | 100                                     | 96.0 ± 4.4   |
| Cd <sup>2+</sup>                 | 50                                      | 97.5 ± 4.8   |
| Al <sup>3+</sup>                 | 30                                      | 98.0 ± 6.6   |
| Cr <sup>3+</sup>                 | 100                                     | 94.0 ± 3.6   |
| Mn <sup>2+</sup>                 | 300                                     | 96.4 ± 5.7   |

<sup>a</sup> Recovery<sup>b</sup> standard deviation (n = 3)Conditions: sample pH = 3.0, As(III) concentration = 100 ng L<sup>-1</sup>, sorption time = 13 min; eluent volume = 2.5 mL, 0.065 mol L<sup>-1</sup> HCl in 1.1 mol L<sup>-1</sup> thiourea solution, elution time = 11 min.<sup>c</sup> Concentration of potentially interfering ions.
